# Supplementary material for: Domain binding and isotype dictate the activity of anti-human OX40 antibodies
Source: PubMed Central journal article supplement (PMC7754644; doi:10.1136/jitc-2020-001557), 2020-12-21
Supplement: jitc-2020-001557supp002.pdf [file jitc-2020-001557supp002.pdf]

| Target                                                 | Clone      | Company                  |
|--------------------------------------------------------|------------|--------------------------|
| mOX40                                                  | OX-86      | ThermoFisher-eBioscience |
| mCD8a                                                  | 53-6.7     | ThermoFisher-eBioscience |
| mCD4                                                   | GK1.5      | ThermoFisher-eBioscience |
| mCD3                                                   | 145-2C11   | ThermoFisher-eBioscience |
| mNK1.1                                                 | PK136      | ThermoFisher-eBioscience |
| mFoxp3                                                 | FJK-16s    | ThermoFisher-eBioscience |
| mB220                                                  | RA3-6B2    | ThermoFisher-eBioscience |
| mCD11c                                                 | N418       | ThermoFisher-eBioscience |
| mF4/80                                                 | BM8        | ThermoFisher-eBioscience |
| mCD11b                                                 | M1/70.15   | ThermoFisher-eBioscience |
| mCD62L                                                 | MEL-14     | ThermoFisher-eBioscience |
| mCD44                                                  | IM7        | ThermoFisher-eBioscience |
| mKLRG1                                                 | 2F1        | ThermoFisher-eBioscience |
| mCD127                                                 | A7R34      | ThermoFisher-eBioscience |
| mCXCR3                                                 | CXCR3-173  | ThermoFisher-eBioscience |
| mCD45.2                                                | 104        | ThermoFisher-eBioscience |
| mT-bet                                                 | eBio4B10   | ThermoFisher-eBioscience |
| mEOMES                                                 | DAN11MAG   | ThermoFisher-eBioscience |
| mCD43 (activation glycoform)                           | 1B11       | BioLegend                |
| mLy6C                                                  | HK1.4      | BioLegend                |
| mLy6G                                                  | 1A8        | BioLegend                |
| h/m Granzyme B                                         | GB11       | ThermoFisher-Invitrogen  |
| H-2K <sup>b</sup> /SIINFEKL tetramer                   |            | In house                 |
| hCD4 (healthy samples)                                 | RPA-T4     | ThermoFisher-eBioscience |
| hCD8 (healthy samples)                                 | SK1        | ThermoFisher-eBioscience |
| hOX40 (healthy samples)                                | ACT35      | ThermoFisher-eBioscience |
| hCD127 (healthy samples)                               | eBioRDR5   | ThermoFisher-eBioscience |
| hFoxp3 (healthy samples)                               | 236A/E7    | ThermoFisher-eBioscience |
| hCD56 (healthy samples)                                | CMSSB      | ThermoFisher-eBioscience |
| hCD14 (healthy samples)                                | 61D3       | ThermoFisher-eBioscience |
| hCD3 (healthy samples)                                 | SK7        | BioLegend                |
| hCD25 (healthy samples)                                | M-A251     | BioLegend                |
| hCD19 (healthy samples)                                | HIB19      | BioLegend                |
| hCD4 (ovarian cancer and human cells in NSG samples)   | RPA-T4     | BD Biosciences           |
| hCD25 (ovarian cancer and human cells in NSG samples)  | M-A251     | BD Biosciences           |
| hCD127 (ovarian cancer and human cells in NSG samples) | HIL-7R-M21 | BD Biosciences           |
| hCD8 (ovarian cancer and human cells in NSG samples)   | RPA-T8     | BD Biosciences           |
| hOX40 (ovarian cancer and human cells in NSG samples)  | ACT35      | BD Biosciences           |
| isotypes                                               |            | Corresponding companies  |
| fixable eFluor780 Live/Dead stain                      |            | ThermoFisher-eBioscience |
| aqua live/dead viability stain                         |            | ThermoFisher-Invitrogen  |
