# Supplementary material for: Domain binding and isotype dictate the activity of anti-human OX40 antibodies
Source: PubMed Central journal article supplement (PMC7754644; doi:10.1136/jitc-2020-001557), 2020-12-21
Supplement: jitc-2020-001557supp004.pdf [file jitc-2020-001557supp004.pdf]

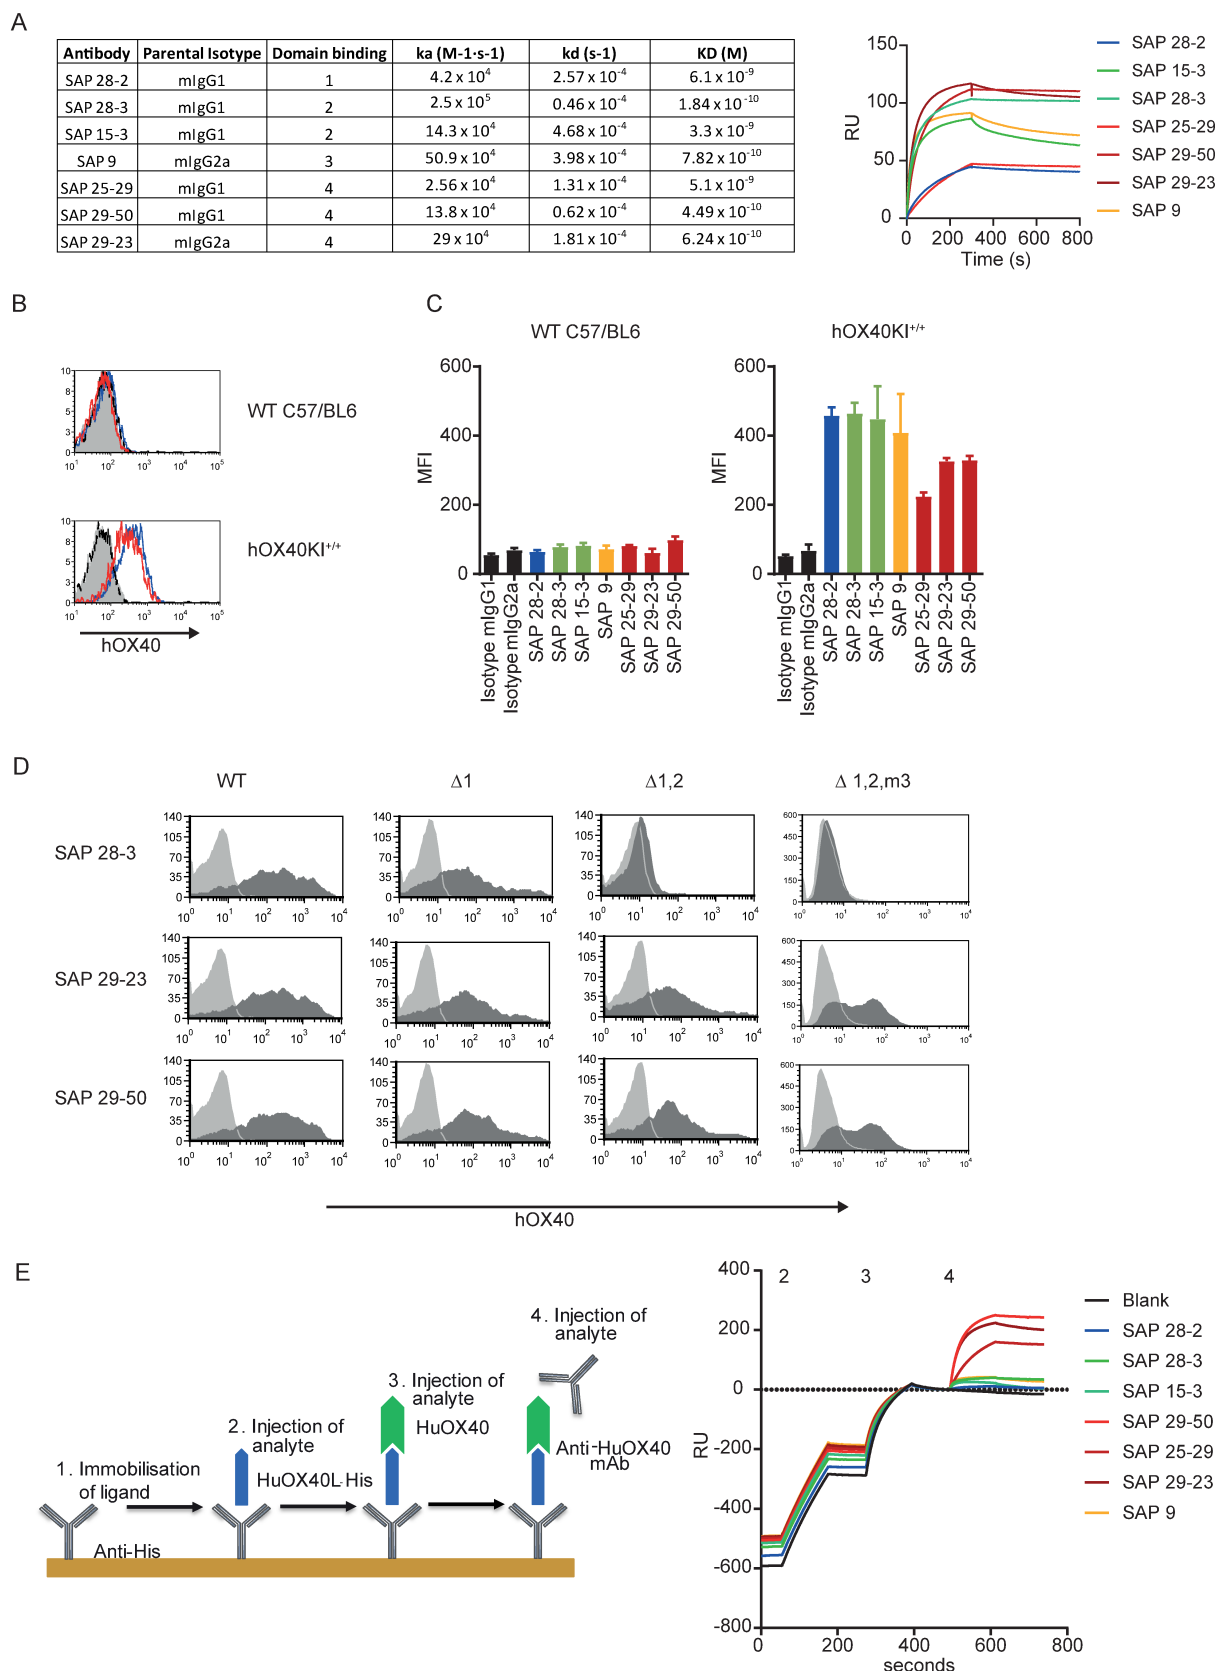

Supplementary Figure 2. Characterisation of anti-hOX40 mAb. A. SPR analysis of anti-hOX40 mAb binding and affinity. B. Binding of anti-hOX40 mAb SAP28-2 mlgG1 (blue line) and SAP 29-23 mlgG2a (red line) to activated Tregs (cells activated with  $\alpha$ CD3 (0.1  $\mu$ g/ml) and  $\alpha$ CD28 (5  $\mu$ g/ml) for 24 hours) from WT (top panel) or hOX40KI<sup>+/+</sup> mice (bottom panel). Isotype controls shown as filled grey histogram (mlgG1) and black dotted line (mlgG2a). C. Binding of all parental anti-hOX40mAb to activated Tregs (cells activated as in B) isolated from WT (left bar chart) or hOX40KI<sup>+/+</sup> mice (right bar chart) n=3. D. Binding of FITC-labelled anti-hOX40 mAb to hOX40 domain mutants. E. Schematic and full SPR analysis of anti-hOX40mAb binding in the presence of hOX40L.
