# Supplementary material for: Domain binding and isotype dictate the activity of anti-human OX40 antibodies
Source: PubMed Central journal article supplement (PMC7754644; doi:10.1136/jitc-2020-001557), 2020-12-21
Supplement: jitc-2020-001557supp005.pdf [file jitc-2020-001557supp005.pdf]

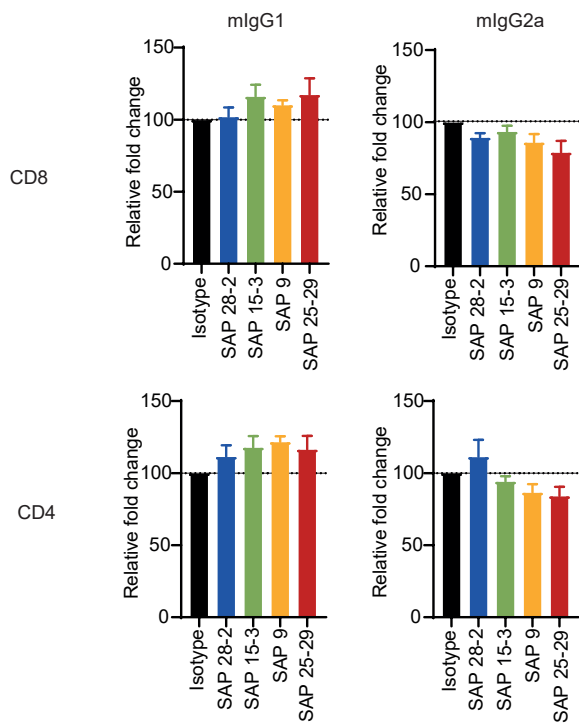

Supplementary Figure 3. anti-hOX40mAb mIgG1 promotes proliferation whilst mIgG2a reduces proliferation. hOX40KI<sup>+/+</sup> splenocytes were activated with  $\alpha$ CD3 (1 $\mu$ g/ml) and  $\alpha$ hOX40 mAb (10 $\mu$ g/ml) for 72 hours and then CFSE dilution analysed. Data presented as fold change over isotype control, n=5.
