# Supplementary material for: Domain binding and isotype dictate the activity of anti-human OX40 antibodies
Source: HighWire-hosted journal article supplement (doi:10.1136/jitc-2020-001557), 2020-12-01
Supplement: jitc-2020-001557supp007_data_supplement.pdf [file jitc-2020-001557supp007_data_supplement.pdf]

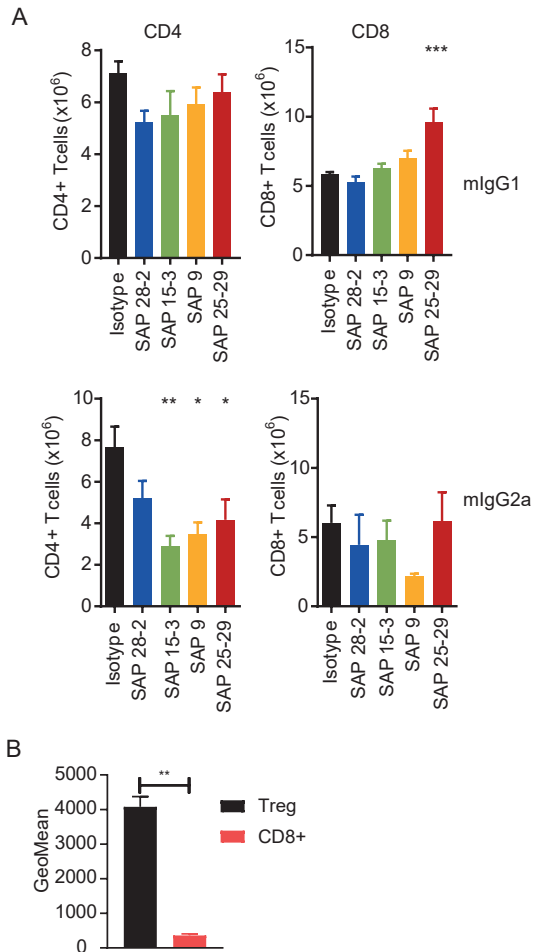

Supplemental Figure 5. Isotype of anti-hOX40 mAb influences effector function. A. CD4 and CD8 T cell numbers assessed on Day 4 in splenocytes isolated from hOX40KI<sup>+/+</sup> mice receiving  $1 \times 10^5$  hOX40KI<sup>+/-</sup> OT-I followed by 100 $\mu$ g anti-hOX40 mAb as either a mIgG1 or mIgG2a (n=7-8, pooled from 2 independent experiments). \*\* p<0.01, \* p<0.05 Dunnett's test. B. hOX40 expression on Treg and CD8+ T cells isolated from NOG mice 2 weeks post injection of hPBMCs (n=5, representative of 2 independent experiments). \*\* p<0.01 Mann Whitney U test.
